# Supplementary material
Source: PubMed Central journal article supplement (PMC1523171)
Supplement: 7601225s1.pdf [file 7601225s1.pdf]

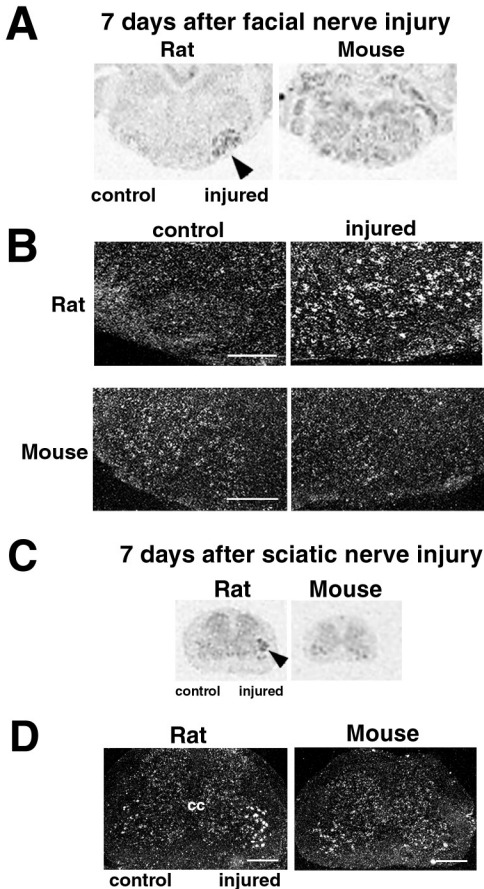

**Supplementary Figure 1** Peripheral nerve injuries enhanced EAAC1 mRNA expression in rats, while unchanged in mice. (A) Film autoradiography of *in situ* hybridization showed that expression of EAAC1 mRNA was up-regulated in injured facial nucleus of rat (arrow). (B) Emulsion autoradiography of EAAC1 mRNA in facial nuclei. Scale bars, 300  $\mu$ m for rat and 150  $\mu$ m for mouse. (C) Expression of EAAC1 mRNA was up-regulated in injured motor neurons of rat lumbar spinal cord 7 days after sciatic nerve injury (arrow). (D) Emulsion autoradiography of EAAC1 mRNA in lumbar spinal cord sections. Scale bars, 250  $\mu$ m for rat and 185  $\mu$ m for mouse. cc, central canal.
