# Supplementary material
Source: PubMed Central journal article supplement (PMC1523171)
Supplement: 7601225s2.pdf [file 7601225s2.pdf]

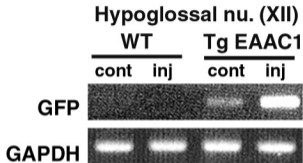

**Supplementary Figure 2** EAAC1 transgenic mice expressed GFP simultaneously. To estimate exogenous expression of EAAC1 mRNA, GFP mRNA expression levels were examined by RT-PCR using total RNA derived from control (cont) and injured (inj) hypoglossal nuclei of wild-type (WT) and EAAC1 transgenic mice (Tg EAAC1) 7 days after axotomy.
