# Supplementary material
Source: PubMed Central journal article supplement (PMC1523171)
Supplement: 7601225s4.pdf [file 7601225s4.pdf]

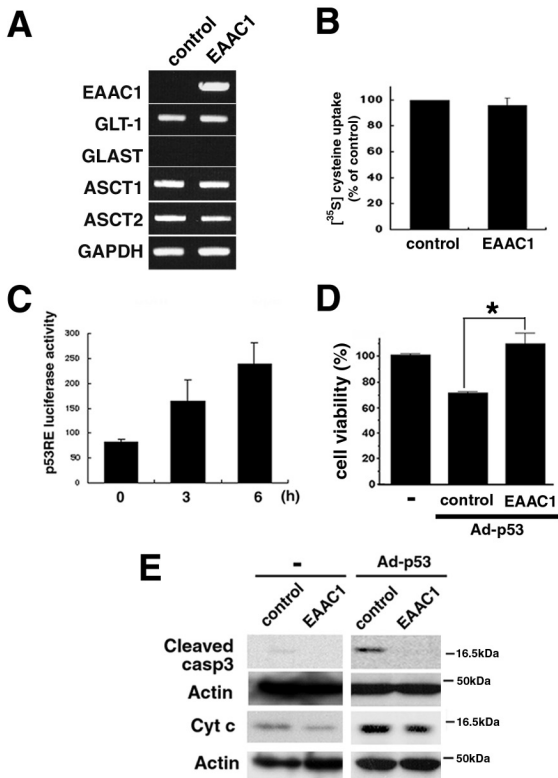

**Supplementary Figure 4** EAAC1 prevents p53-dependent death in differentiated PC12 cells. (A) Expression level of other transporter family members were not altered in the EAAC1-overexpressing PC12 cells. Differentiated PC12 cells were infected with control and EAAC1 adenoviruses. At 48 hr after infection, total RNA was extracted and converted to cDNA. RT-PCR was performed using indicated primers pairs. (B) Cysteine uptake activity in control or EAAC1 adenovirus-infected PC12 cells. Uptake activity is expressed as a percentage of that in control cells (mean  $\pm$  SD). (C) Differentiated PC12 cells were transfected with a p53 dependent promoter (p53RE)-luciferase gene reporter plasmid. At 48 hr after transfection, luciferase activity was measured at 0, 3 and 6 hr after NGF withdrawal. Data are presented as mean  $\pm$  SD of at least three experiments. (D) Differentiated PC12 cells were infected with control or EAAC1 adenoviruses together with p53 adenovirus (Ad-p53). Cell viability was determined 48 hr after infection. Data are presented as a percentage of values of non-treated cells. Data are mean  $\pm$  SD ( $p < 0.01$ ; Student's *t*-test). (E) Expression of cleaved caspase-3 and cytosolic cytochrome c detected by immunoblot analysis. Differentiated PC12 cells were infected with control or EAAC1 adenoviruses, together with Ad-p53. After 48 hr, cells were collected and lysed in lysis buffer.
