# Supplementary material
Source: PubMed Central journal article supplement (PMC1523171)
Supplement: 7601225s5.pdf [file 7601225s5.pdf]

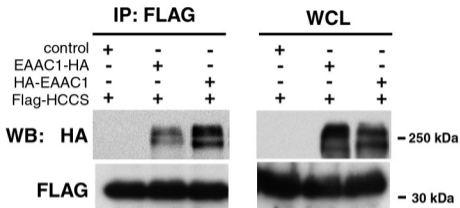

**Supplementary Figure 5** HCCS interacts with EAAC1, not the cleaved form of EAAC1 N-terminus. COS-7 cells were transfected with N-terminal or C-terminal HA-tagged EAAC1 (HA-EAAC1 and EAAC1-HA) together with FLAG-tagged HCCS (FLAG-HCCS). Whole-cell lysates (WCL) from COS-7 cells were immunoprecipitated using anti-FLAG antibody (IP: FLAG) followed by western blotting (WB) with anti-HA antibody. Both forms of EAAC1 were similarly precipitated using anti-FLAG antibody.
